# Supplementary material for: Photocatalytic activity enhancement of Cu2O cubes functionalized with 2-ethynyl-6-methoxynaphthalene through band structure modulation
Source: Royal Society of Chemistry journal article supplement (doi:10.1039/d1tc05278k), 2022-01-01
Supplement: d1tc05278k1.pdf [file d1tc05278k1.pdf]

Electronic Supplementary Information

**Photocatalytic activity enhancement of Cu<sub>2</sub>O cubes functionalized with 2-ethynyl-6-methoxynaphthalene through band structure modulation**

Anindya Sundar Patra,<sup>a</sup> Jui-Cheng Kao,<sup>b</sup> Shang-Ju Chan,<sup>a</sup> Po-Jung Chou,<sup>a</sup> Jyh-Pin Chou,<sup>c</sup> Yu-Chieh Lo<sup>\*b</sup> and Michael H. Huang<sup>\*a</sup>

<sup>a</sup>*Department of Chemistry and Frontier Research Center on Fundamental and Applied Sciences of Matters, National Tsing Hua University, Hsinchu 300044, Taiwan.*

<sup>b</sup>*Department of Materials Science and Engineering, National Yang Ming Chiao Tung University, Hsinchu 300093, Taiwan.*

<sup>c</sup>*Department of Physics, National Changhua University of Education, Changhua 50007, Taiwan.*

**Chemicals**

Sodium dodecyl sulfate (NaC<sub>12</sub>H<sub>25</sub>SO<sub>4</sub>, 100%, Mallinckrodt), anhydrous copper(II) chloride (CuCl<sub>2</sub>, 97%, Sigma–Aldrich), sodium hydroxide (NaOH, 98.2%, Mallinckrodt), hydroxylamine hydrochloride (NH<sub>2</sub>OH·HCl, 99%, Sigma–Aldrich), sodium oxalate (Na<sub>2</sub>C<sub>2</sub>O<sub>4</sub>, 99.5%, Sigma–Aldrich), chromium trioxide (CrO<sub>3</sub>, 99.5%, Acros Organics), methyl orange (C<sub>14</sub>H<sub>14</sub>N<sub>3</sub>NaO<sub>3</sub>S, Hayashi Pure Chemical), and 2-ethynyl-6-methoxynaphthalene (2E-6MN, 97%, Sigma–Aldrich) were used as received without further purification. Potassium sulfate (K<sub>2</sub>SO<sub>4</sub>, 99%, Sigma–Aldrich) was used as an electrolyte solution for the electrochemical measurements. Ultrapure distilled and deionized water (18.3 MΩ) was used to prepare aqueous solutions. 5,5-dimethyl-1-pyrroline-N-oxide (DMPO, 97%, Matrix), a spin-trapping reagent, was purified with activated carbon.

**Synthesis of Cu<sub>2</sub>O crystals**

For the synthesis of Cu<sub>2</sub>O cubes and octahedra in 250-mL beakers, 1.392 g of SDS was dissolved in 152.8 and 144.8 mL of deionized water, respectively, and kept under vigorous stirring in a water bath at 31 °C. After dissolution of SDS, 1.6 mL of 0.1 M CuCl<sub>2</sub> solution was added. 8–10 min after the addition of 0.1 M CuCl<sub>2</sub> solution into the beakers, 3.2 mL of 1.0 M NaOH solution was added and stirred for 5 s. The solution color changed from colorless to light blue immediately due to the formation of Cu(OH)<sub>2</sub>. Then 2.4 and 10.4 mL of 0.2 M NH<sub>2</sub>OH·HCl solution were quickly injected with stirring for 10 s, and the aqueous solutions were aged for 50 and 120 min for the synthesis of Cu<sub>2</sub>O cubes and octahedra, respectively.

To make Cu<sub>2</sub>O rhombic dodecahedra, 27.68 mL of deionized water was added to

0.348 g of SDS in a 50-mL sample vial and kept under vigorous stirring in a water bath at 31 °C. After dissolution of SDS in water, 2 mL of 0.1 M CuCl<sub>2</sub> solution was injected and stirred for 8–10 min. Next, 0.72 mL of 1.0 M NaOH solution was added into the sample vial and stirred for 5 s. Then, 9.6 mL of 0.1 M NH<sub>2</sub>OH·HCl solution was added into the sample vial and stirred for 5 s. Finally, the aqueous solutions were aged for 50 min.

After completion of the reaction, the Cu<sub>2</sub>O particles were centrifuged at 5000 rpm for 3 min and washed several times with 1:1 volume ratio of water and ethanol and finally washed with 99.8% ethanol. The particles were dried by purging with nitrogen gas and stored in a vacuum chamber.

### Calculations of the amounts of 2E-6MN needed for Cu<sub>2</sub>O functionalization

From average particle sizes, single particle volumes and surface areas were determined as seen in Fig. S3. From density of Cu<sub>2</sub>O (6.0 g/cm<sup>3</sup>), the number of particles, total particle surface area, and total surface copper atoms of each particle shape in 10 mg were obtained, using the surface copper atom densities reported before (10.98, 14.27, and 7.76 Cu atoms/nm<sup>2</sup> for the (100), (111), and (110) planes of Cu<sub>2</sub>O, respectively).<sup>1</sup> For molar ratios of 1:5, 1:10, and 1:100 of surface Cu atoms to 2E-6MN, weights of 2E-6MN needed were calculated for addition into 5 mL of ethanol with dispersed Cu<sub>2</sub>O crystals (Table S1). Next, for fair photocatalytic activity comparison, a fixed total particle surface area of 0.03 m<sup>2</sup> was chosen. From the number of particles having this total surface area, 7.89, 4.72, and 6.99 mg of 2E-6MN-functionalized Cu<sub>2</sub>O rhombic dodecahedra, octahedra, and cubes were respectively used for the photocatalysis experiments (Table S2).

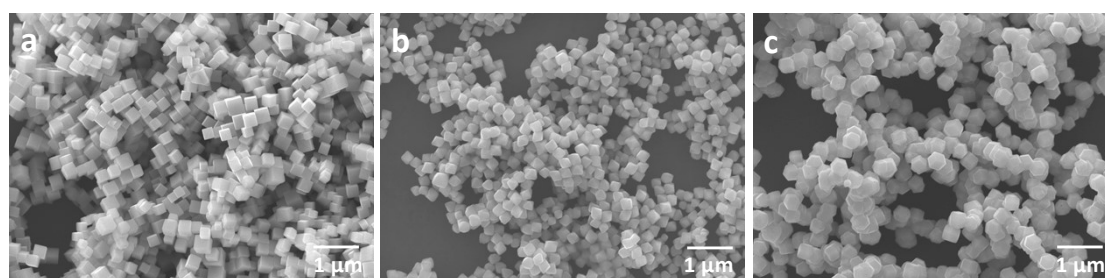

**Fig. S1** SEM images of the synthesized Cu<sub>2</sub>O (a) cubes, (b) octahedra, and (c) rhombic dodecahedra.

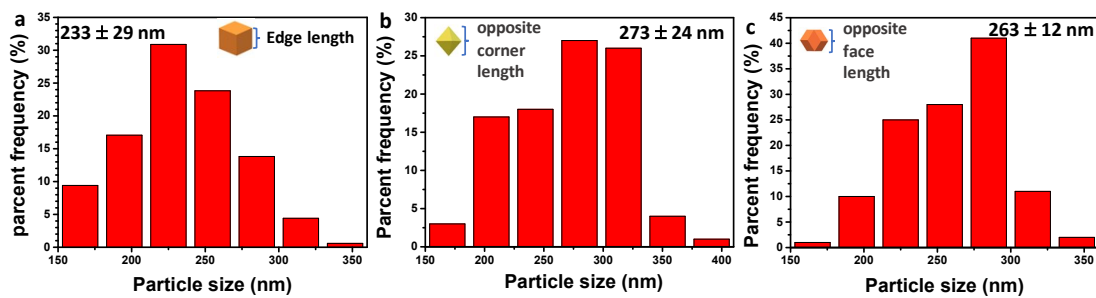

**Fig. S2** Size distribution histograms of the synthesized Cu<sub>2</sub>O (a) cubes, (b) octahedra, and (c) rhombic dodecahedra.

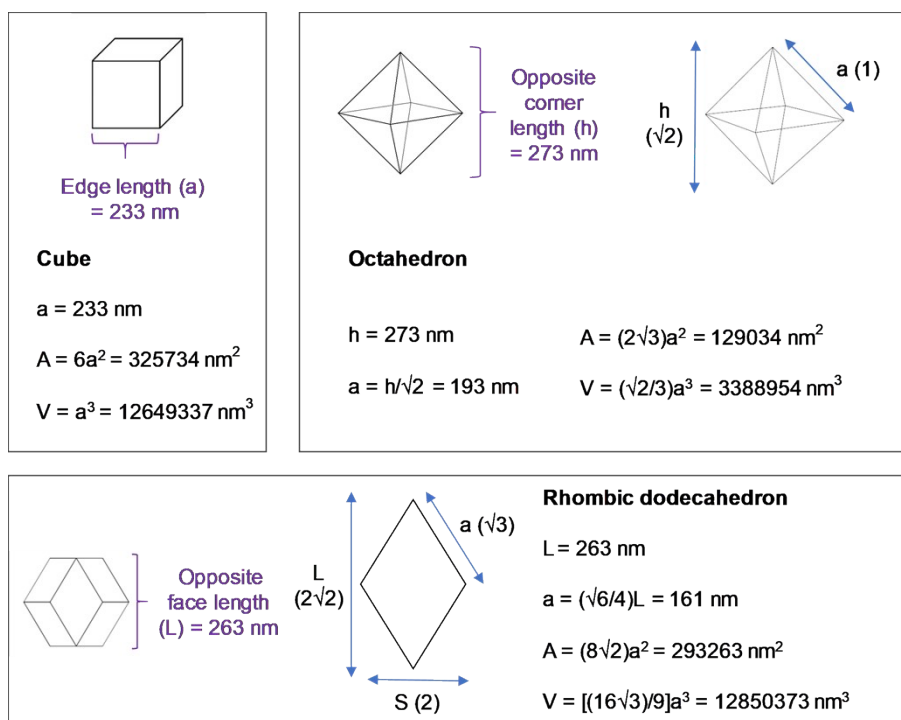

**Fig. S3** Calculations of particle surface areas and volumes.

**Table S1** Calculations for the amounts of 2E-6MN molecules needed to functionalize different Cu<sub>2</sub>O crystals.

|                                 | RD                    |      |       | Octahedra             |      |       | Cubes                 |      |       |
|---------------------------------|-----------------------|------|-------|-----------------------|------|-------|-----------------------|------|-------|
| Size (nm)                       | 263                   |      |       | 273                   |      |       | 233                   |      |       |
| Weight (mg)                     | 10                    |      |       | 10                    |      |       | 10                    |      |       |
| Surface area (nm <sup>2</sup> ) | $3.8 \times 10^{16}$  |      |       | $6.3 \times 10^{16}$  |      |       | $4.3 \times 10^{16}$  |      |       |
| Surface Cu atoms                | $2.95 \times 10^{17}$ |      |       | $9.05 \times 10^{18}$ |      |       | $4.71 \times 10^{17}$ |      |       |
| Surface Cu atoms:2 E-6MN        | 1:5                   | 1:10 | 1:100 | 1:5                   | 1:10 | 1:100 | 1:5                   | 1:10 | 1:100 |
| Weight of 2E-6MN (mg)           | 0.44                  | 0.89 | 8.9   | 1.37                  | 2.74 | 27.4  | 0.7                   | 1.4  | 14.2  |

**Table S2** Calculations of the amounts of different Cu<sub>2</sub>O crystals needed to have a total particle surface area of 0.3 m<sup>2</sup>.

|                                      | RD                     | Octahedra              | Cubes                  |
|--------------------------------------|------------------------|------------------------|------------------------|
| Size (nm)                            | 263                    | 273                    | 233                    |
| Fixed surface area (m <sup>2</sup> ) | 0.3                    | 0.3                    | 0.3                    |
| Number of particles                  | $1.0 \times 10^{11}$   | $2.3 \times 10^{11}$   | $9.2 \times 10^{10}$   |
| Total volume (nm <sup>3</sup> )      | $1.315 \times 10^{18}$ | $7.881 \times 10^{17}$ | $1.165 \times 10^{18}$ |
| Weight (mg)                          | 7.89                   | 4.72                   | 6.99                   |

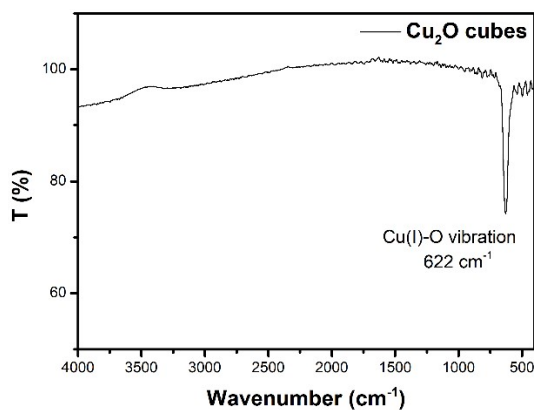

**Fig. S4** FT-IR spectrum of pristine Cu<sub>2</sub>O cubes.

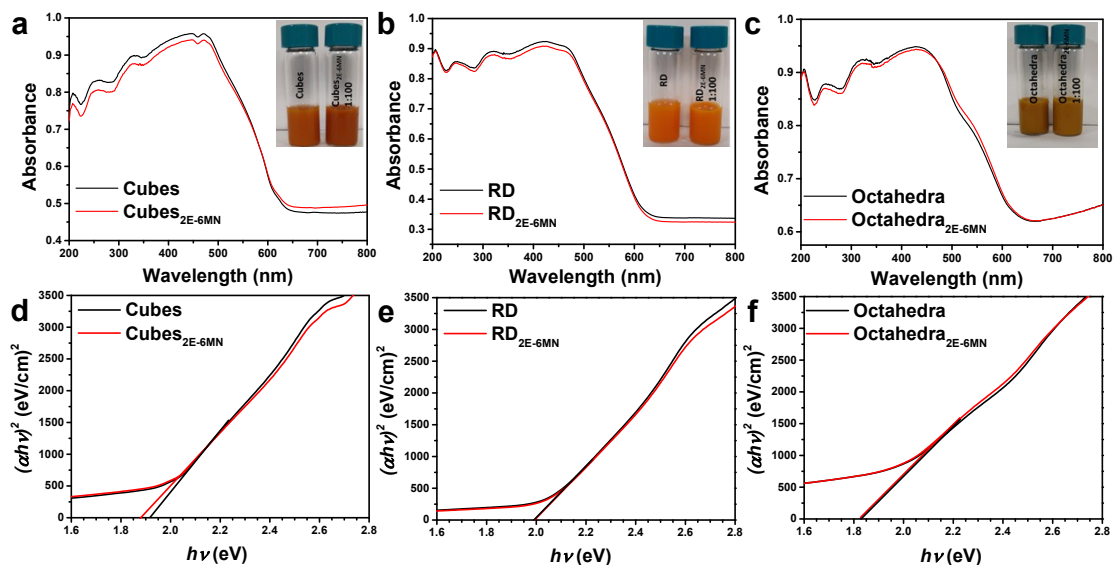

**Fig. S5** (a–c) Diffuse reflectance spectra of the pristine and 2E-6MN-modified  $\text{Cu}_2\text{O}$  crystals and (d–f) the corresponding Tauc plots.  $\text{Cu}_2\text{O}$  particles with a surface Cu atom to 2E-6MN molar ratio of 1:100 were used. Photographs of the particle solutions are also shown.

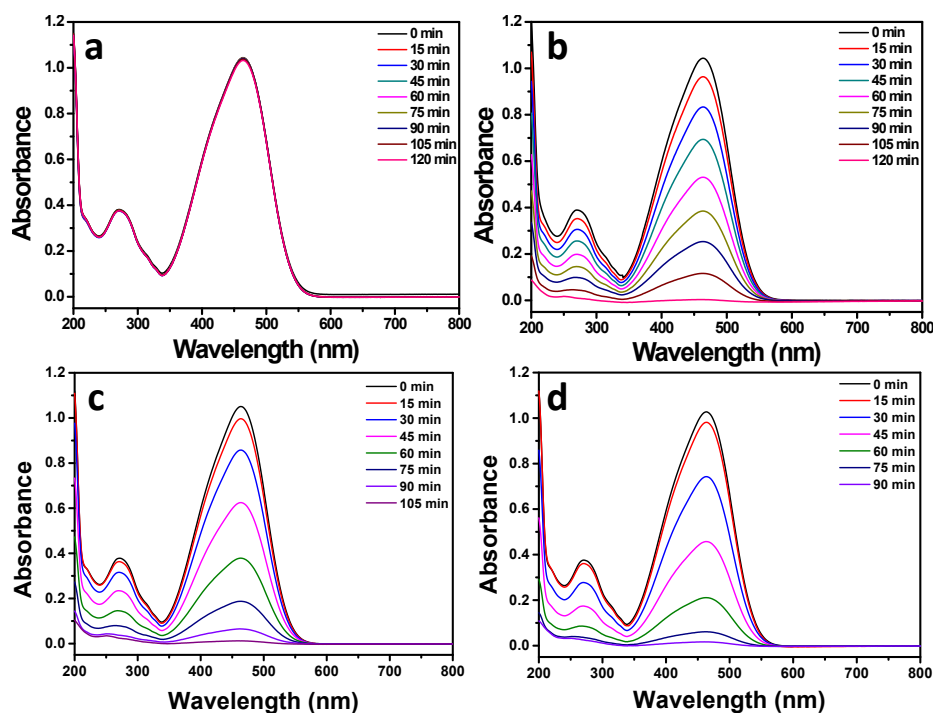

**Fig. S6** UV-vis absorption spectra of methyl orange as a function of irradiation time using (a) pristine and (b–d) 2E-6MN-modified  $\text{Cu}_2\text{O}$  cubes as the photocatalysts with surface copper atoms to 2E-6MN molar ratios of (b) 1:5, (c) 1:10, and (d) 1:100.

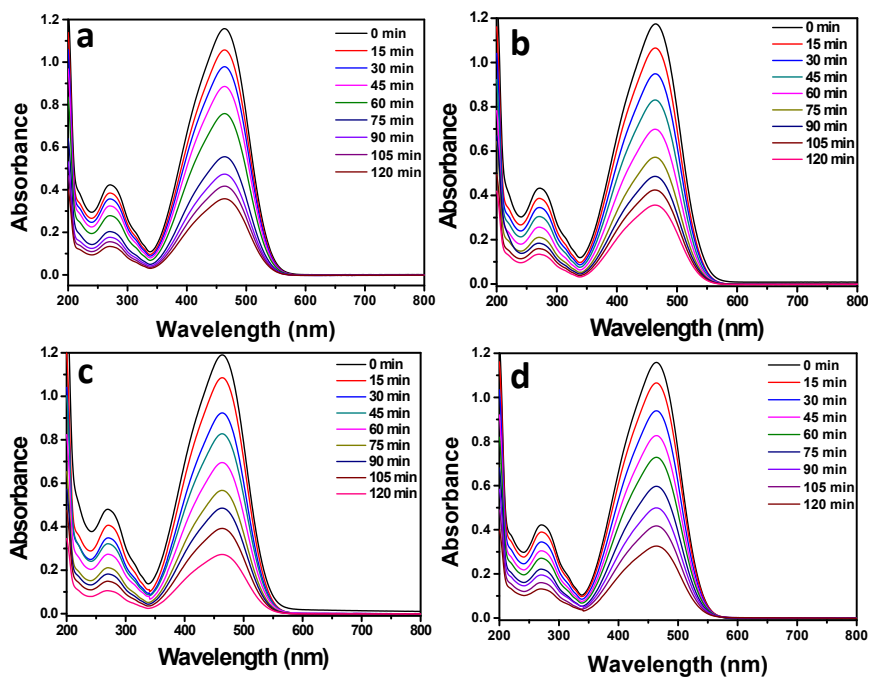

**Fig. S7** UV-vis absorption spectra of methyl orange as a function of irradiation time using (a) pristine and (b-d) 2E-6MN-modified Cu<sub>2</sub>O octahedra as the photocatalysts with surface Cu atoms to 2E-6MN molar ratios of (b) 1:5, (b) 1:10, and (c) 1:100.

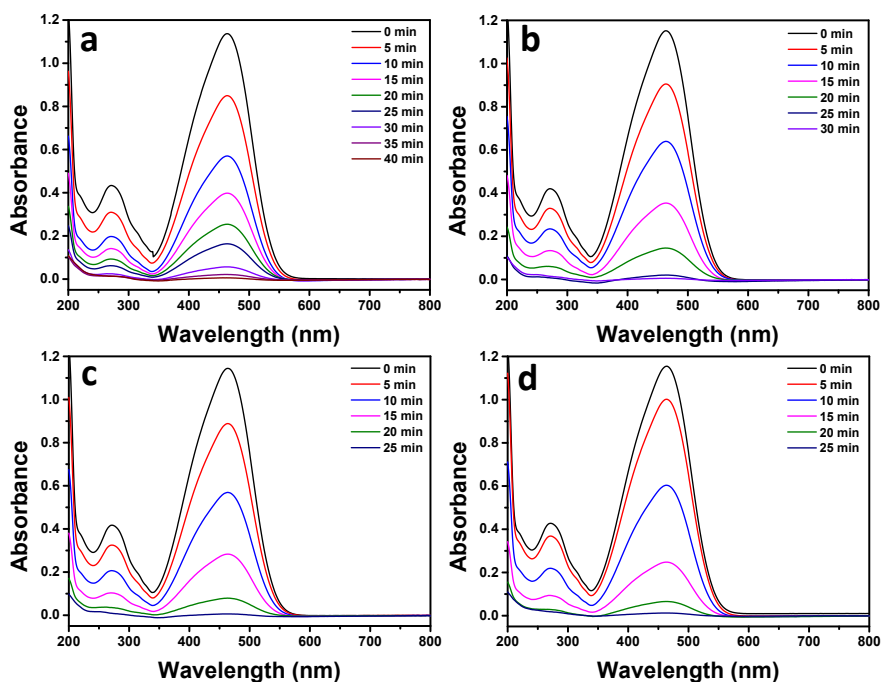

**Fig. S8** UV-vis absorption spectra of methyl orange as a function of irradiation time using (a) pristine and (b-d) 2E-6MN-modified Cu<sub>2</sub>O rhombic dodecahedra as the photocatalysts with surface Cu atoms to 2E-6MN molar ratios of (b) 1:5, (b) 1:10, and (c) 1:100.

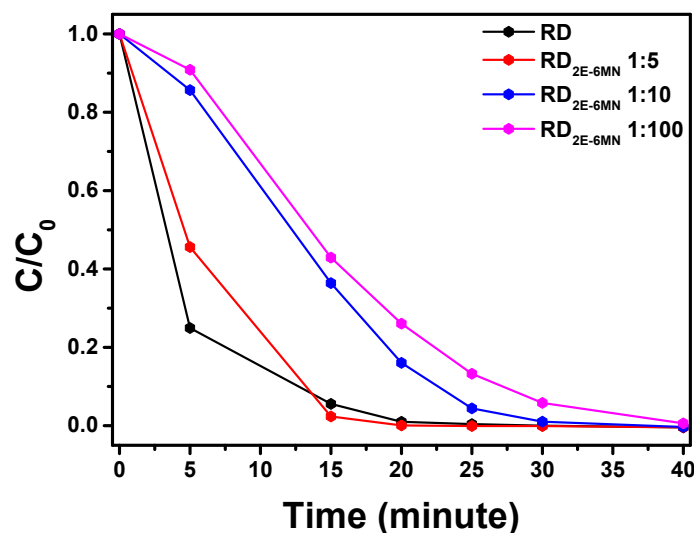

**Fig. S9** Extents of MO photodegradation using pristine and modified Cu<sub>2</sub>O rhombic dodecahedra that have been observed in one experiment.

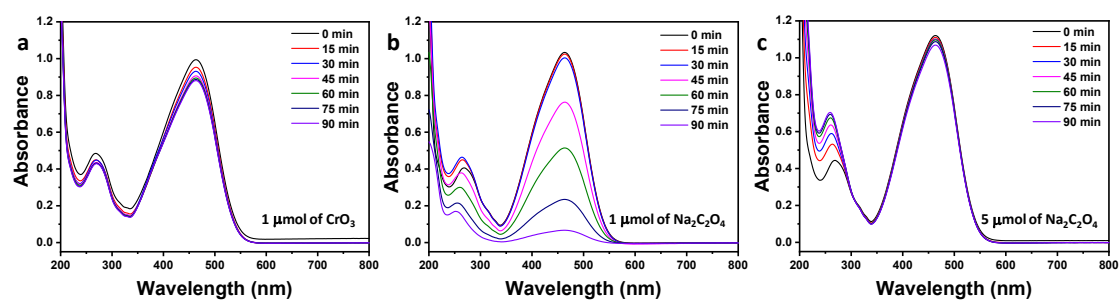

**Fig. S10** UV-vis absorption spectra of methyl orange as a function of irradiation time using 1:100 2E-6MN-modified Cu<sub>2</sub>O cubes as the photocatalyst and in the presence of (a) 1 μmole of CrO<sub>3</sub>, (b) 1 μmole of Na<sub>2</sub>C<sub>2</sub>O<sub>4</sub>, and (c) 5 μmole of Na<sub>2</sub>C<sub>2</sub>O<sub>4</sub>.

**Table S3** Charge transfer resistance ( $R_{ct}$ ) values for different Cu<sub>2</sub>O samples and the equivalent circuit used to fit the EIS data.

| Sample                          | $R_s$ ( $\Omega$ ) | $C_{dl}$ ( $\mu F$ ) | $R_{CT}$ ( $K\Omega$ ) |
|---------------------------------|--------------------|----------------------|------------------------|
| Cubes                           | 65.74              | 3.8                  | 9.3                    |
| Cubes <sub>2E-6MN</sub> 1:100   | 22.8               | 6.4                  | 5.6                    |
| RD                              | 24.38              | 17.9                 | 5.5                    |
| RD <sub>2E-6MN</sub> 1:100      | 23.37              | 40.4                 | 2.9                    |
| Octahedra                       | 25.47              | 33.4                 | 6.5                    |
| Octahedra <sub>2E-6MN</sub> 1:5 | 25.08              | 33.7                 | 6.1                    |

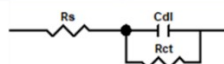

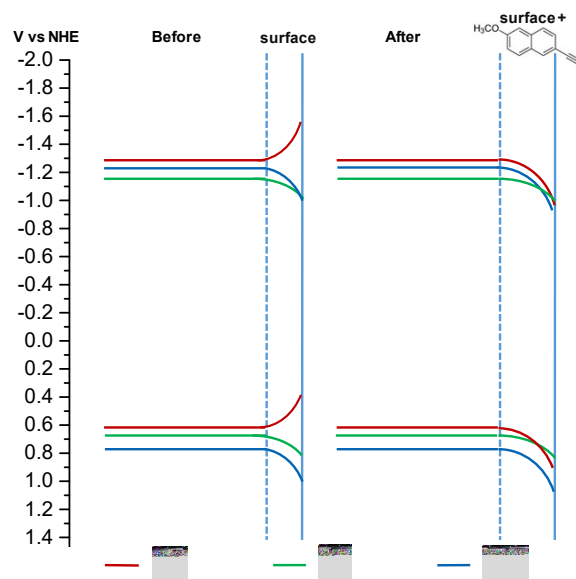

**Fig. S11** Adjusted band diagram of different  $\text{Cu}_2\text{O}$  crystals before and after 2E-6MN modification. The valence band energies use values from our previous work, while the conduction band energies use the determined band gaps from this work.<sup>2</sup> The idea is that the new surface is now consisted of the original thin surface layer of  $\text{Cu}_2\text{O}$  causing the facet-dependent behaviors plus the 2E-6MN monolayer.

#### references

- 1 K. Chanda, S. Rej and M. H. Huang, M. H. *Chem.–Eur. J.*, 2013, **19**, 16036–16043.
- 2 T.-Y. Liang, S.-J. Chan, A. S. Patra, P.-L. Hsieh, Y.-A. Chen, H.-H. Ma and M. H. Huang, *ACS Appl. Mater. Interfaces*, 2021, **13**, 11515–11523.
